# Supplementary material for: Scaffold-induced compression enhances ligamentization potential of decellularized tendon graft reseeded with ACL-derived cells
Source: PubMed Central journal article supplement — iScience. 2023 Nov 23;26(12):108521. doi: 10.1016/j.isci.2023.108521 (PMC10755058; doi:10.1016/j.isci.2023.108521), 2023-11-23
Supplement: mmc1.pdf [file mmc1.pdf]

**Supplemental information**

**Scaffold-induced compression enhances  
ligamentization potential of decellularized  
tendon graft reseeded with ACL-derived cells**

**Jinsung Park, Hyunsoo Soh, Sungsin Jo, Subin Weon, Seung Hoon Lee, Jeong-Ah Park, Myung-Kyu Lee, Tae-Hwan Kim, Il-Hoon Sung, and Jin Kyu Lee**

## Supplementary figures

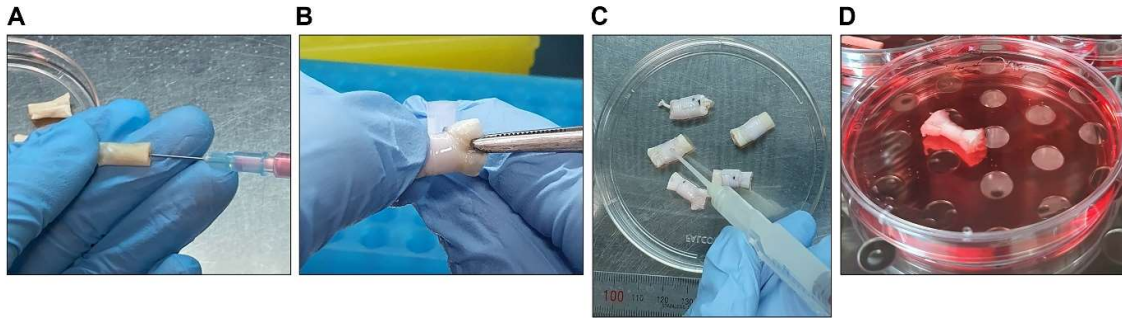

**Supplementary figure 1. Experimental design. Related to Figure 1.** (A) A total of  $1 \times 10^6$  ACL-derived cells was injected with cell suspension into the tendon allograft. The tendon allograft-injected ACL-derived cells were manually wounded with a nanofiber scaffold 4-5 times (B) and sealed with Tissel, a sealant solution (C). (D) The tendon allograft was incubated in DMEM containing 10% serum for one, seven, or 14 days.

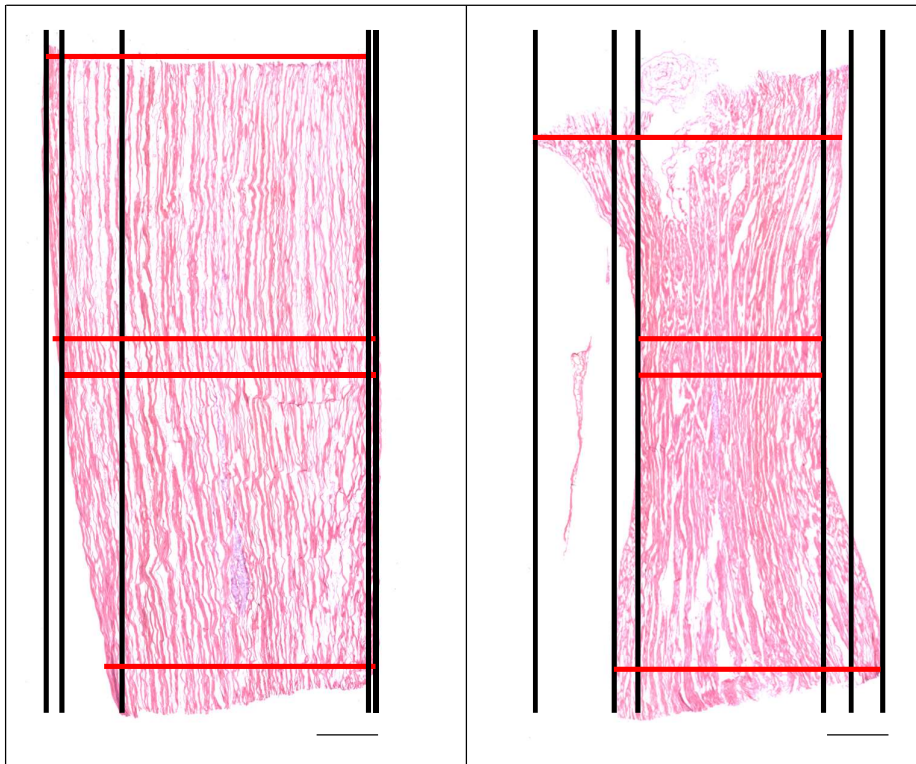

Scale bar: 1.5 mm

**Supplementary figure 2. Compression ratio measurement. Related to Figure 1.** The ratio of inner to outer diameter of samples from the compression and non-compression groups was measured. The locations for these measurements are demonstrated by the parallel red lines in the figure. Frozen tissue blocks were cryo-sectioned longitudinally at uniform thickness. The most representative slide with the broadest tissue diameter was chosen. Image J software was used for measurements. The ratio was 73.51% in the comparison group and 98.54% in the non-compression group.

**Supplementary table**

**Primer sequences for RT-qPCR**

|         |                             |
|---------|-----------------------------|
| YAP-F   | 5'-TGCTGTCCCAGATGAACGTC-3'  |
| YAP-R   | 5'-GGTTCATGGCAAACGAGGG-3'   |
| COL1-F  | 5'-AGTGGTTTGGATGGTGCCAA-3'  |
| COL1-R  | 5'-GCACCATCATTTCCACGAGC-3'  |
| COL3-F  | 5'-CTTCTCTCCAGCCGAGCTTC-3'  |
| COL3-R  | 5'-CCAGTGTGTTTCGTGCAACC-3'  |
| TNC-F   | 5'-GGTTGCTGGAGACTGTGGAA-3'  |
| TNC-R   | 5'-AGGTTTTCCAGAAGGGGCAG-3'  |
| TNMD-F  | 5'-AATGAACAGTGGGTGGTCCC-3'  |
| TNMD-R  | 5'-TTGCCTCGACGGCAGTAAAT-3'  |
| SMA-F   | 5'-GTGATGGTGGGAATGGGACAA-3' |
| SMA-R   | 5'-AGTGGTGCCAGATCTTTTCCA-3' |
| GAPDH-F | 5'-CAAGATCATCAGCAATGCC-3'   |
| GAPDH-R | 5'-CTGTGGTCATGAGTCCTTCC-3'  |

**Table S1. All primer sequence information mentioned in the article. Related to STAR Methods.**
